# Supplementary material for: Hydrothermal synthesis of Eu3+-doped BaMoO4 fluorescent probe for the selective detection of Fe3+ ions
Source: Royal Society of Chemistry journal article supplement (doi:10.1039/d2nj02030k), 2022-01-01
Supplement: d2nj02030k1.pdf [file d2nj02030k1.pdf]

Supporting Information

## Hydrothermal synthesis of Eu<sup>3+</sup>-doped BaMoO<sub>4</sub> fluorescent probe for selectively detecting Fe<sup>3+</sup> ions

Dongmei Wang,<sup>a</sup> Yunhao Liang,<sup>a</sup> Zhiyi Wang,<sup>a</sup> Shanshan Hu<sup>\*a</sup> and Jun Yang<sup>\*a</sup>

**Table S1.** The lattice constants of the obtained BaMoO<sub>4</sub>: Eu<sup>3+</sup> phosphors.

| Sample                                         | Lattice constant        |              |
|------------------------------------------------|-------------------------|--------------|
|                                                | <i>a</i> = <i>b</i> / Å | <i>c</i> / Å |
| BaMoO <sub>4</sub> : 2 mol% Eu <sup>3+</sup>   | 5.6010                  | 12.830       |
| BaMoO <sub>4</sub> : 1.5 mol% Eu <sup>3+</sup> | 5.5974                  | 12.839       |
| BaMoO <sub>4</sub> : 1 mol% Eu <sup>3+</sup>   | 5.6060                  | 12.837       |
| BaMoO <sub>4</sub> : 0.8 mol% Eu <sup>3+</sup> | 5.6094                  | 12.838       |
| BaMoO <sub>4</sub> : 0.5 mol% Eu <sup>3+</sup> | 5.5959                  | 12.828       |
| JCPDS: 29-0193                                 | 5.5802                  | 12.821       |

**Table S2.** Comparison of different methods.

| Method                                                                     | Production process | Instruments and medicines | Selectivity and Sensitivity | Response |
|----------------------------------------------------------------------------|--------------------|---------------------------|-----------------------------|----------|
| Organic Fluorescent Probe <sup>1</sup>                                     | Sophisticated      | Expensive and Complex     | High                        | Slower   |
| Metal-Organic frameworks <sup>2</sup>                                      | Complicated        | Simple                    | High                        | Fast     |
| Atomic Absorption Spectrometry(AAS) <sup>3</sup>                           | Cumbersome         | Expensive and complex     | High                        | Normal   |
| BaMoO <sub>4</sub> : Eu <sup>3+</sup> phosphor <sup>our present work</sup> | Simple             | Cheap and simple          | High                        | Fast     |

1 Y. Guo, L. Wang, J. Zhuo, B. Xu, X. Li, J. Zhang, Z. Zhang, H. Chi, Y. Dong and G. Lu, A pyrene-based dual chemosensor for colorimetric detection of Cu<sup>2+</sup> and fluorescent detection of Fe<sup>3+</sup>. *Tetrahedron Letters*, **2017**, 58 (42), 3951-3956.

2 H. Guo, N. Wu, R. Xue, H. Liu, L. Li, M. Y. Wang, W. Q. Yao, Q. Li and W. Yang, Multifunctional Ln-MOF luminescent probe displaying superior capabilities for highly selective sensing of Fe<sup>3+</sup> and Al<sup>3+</sup> ions and nitrotoluene. *Colloids and Surfaces A: Physicochemical and Engineering Aspects*, **2020**, 585.

3 M.Yaman and G.Kaya, Speciation of iron (II) and (III) by using solvent extraction and flame atomic absorption spectrometry. *Analytica Chimica Acta*, **2005**, 540 (1), 77-81.

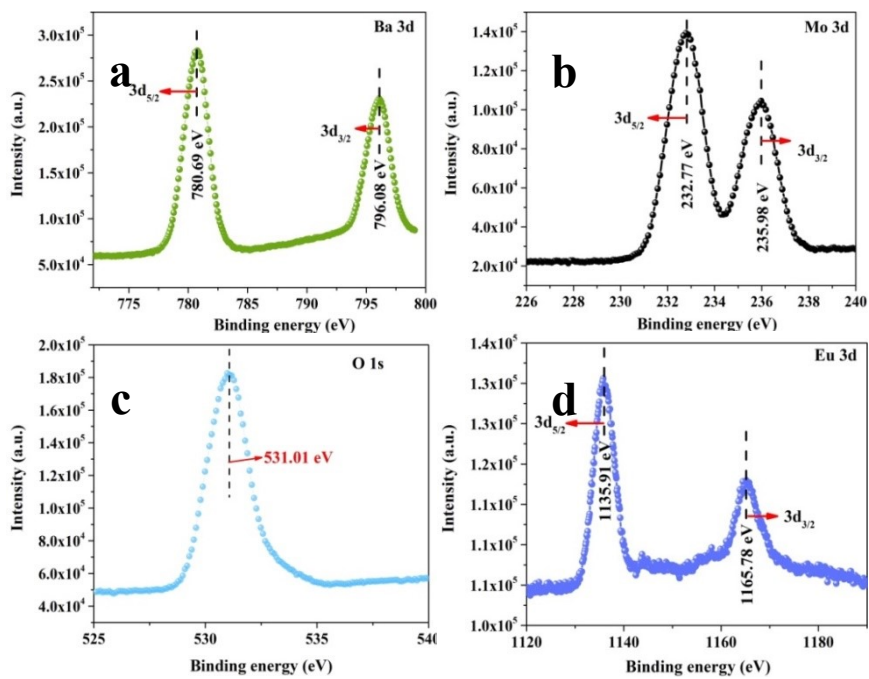

Figure S1. XPS of Ba 3d (a), Mo 3d (b), O 1s (c) and Eu 3d (d), respectively.

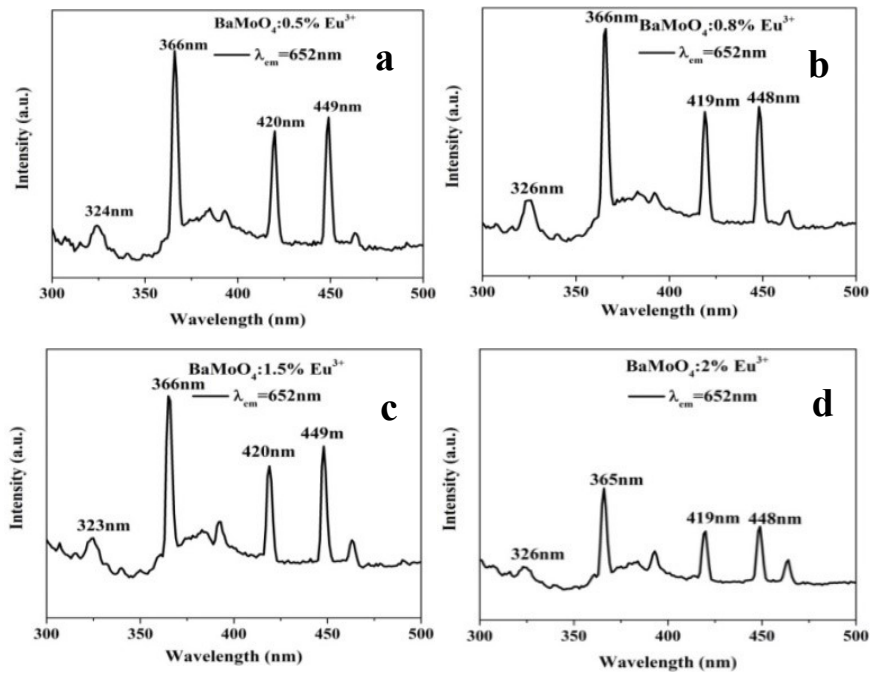

Figure S2. The excitation spectra of various concentrations of  $\text{Eu}^{3+}$ .

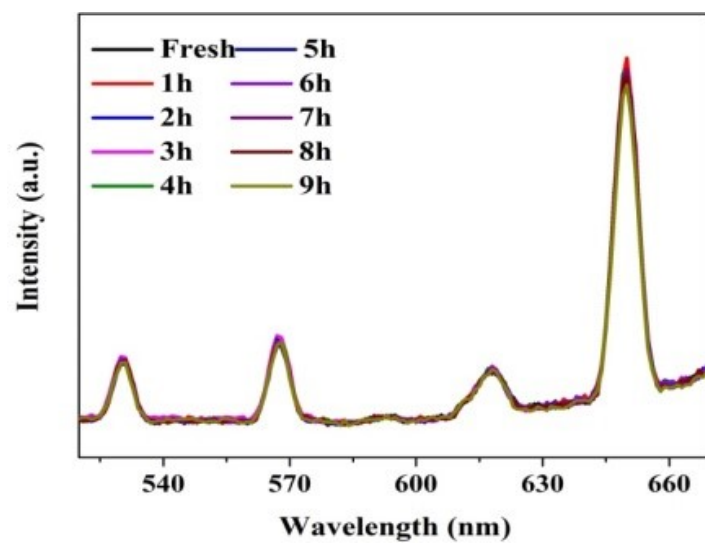

**Figure S3.** Hour-to-hour photostability of BaMoO<sub>4</sub>:Eu<sup>3+</sup> phosphors after immersing in aqueous solution for several hours.

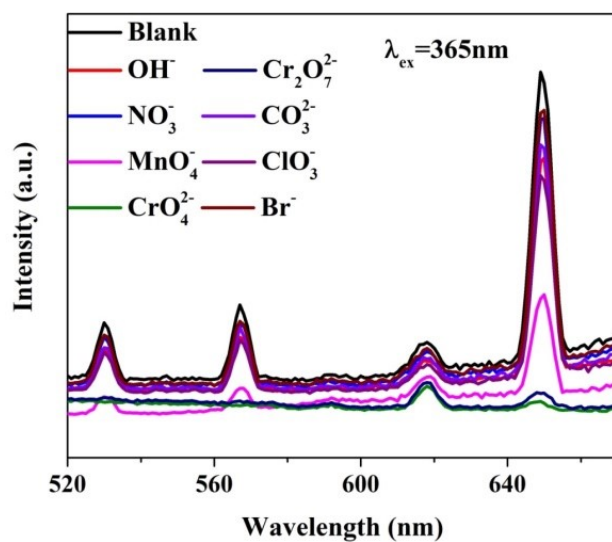

Figure S4. Emission spectra of BaMoO<sub>4</sub>: Eu<sup>3+</sup> suspensions after mixing with different anions.
